# Supplementary material for: First-in-Class Humanized Antibody against Alternatively Spliced Tissue Factor Augments Anti-Metastatic Efficacy of Chemotherapy in a Preclinical Model of Pancreatic Ductal Adenocarcinoma
Source: MDPI journal article supplement (doi:10.3390/ijms25052580), 2024-02-23
Supplement: s1 [file s1]

## Supplementary Figures

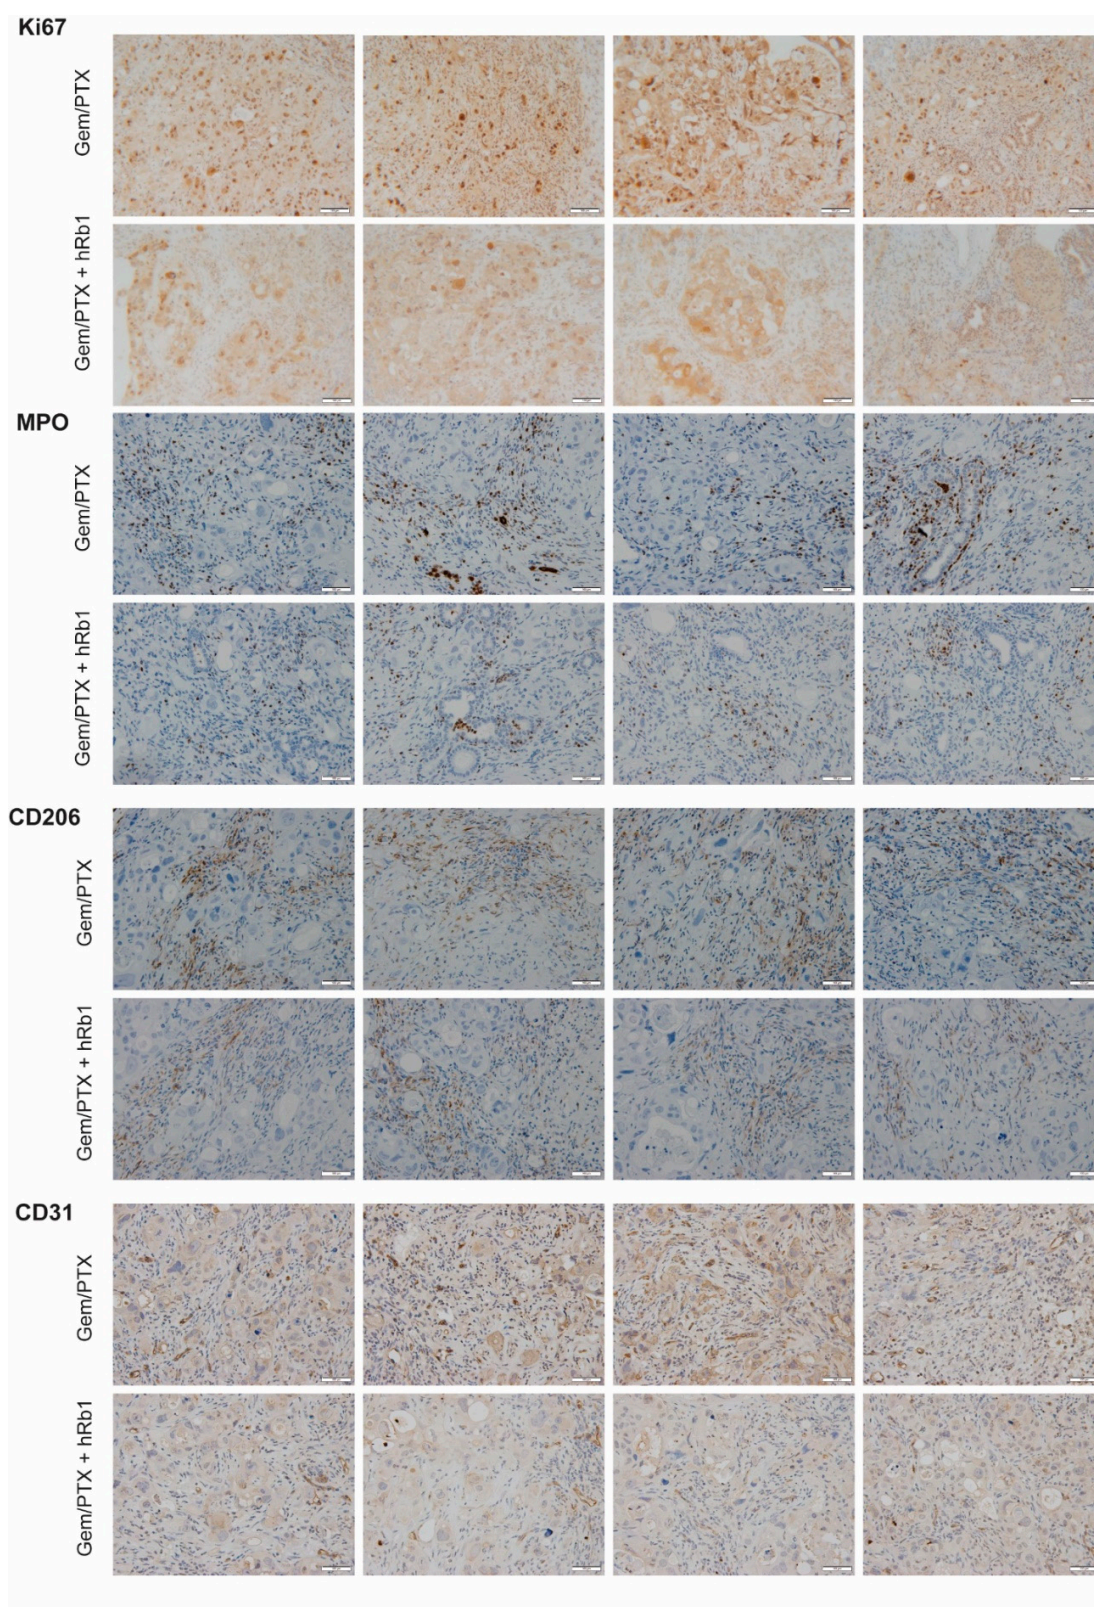

**Supplementary Figure S1.** Representative images, IHC of primary tumor tissue stained for the indicated markers (Ki67, MPO, CD206, CD31); original magnification 20x. 100 µm scale bar shown in bottom right of each micrograph.

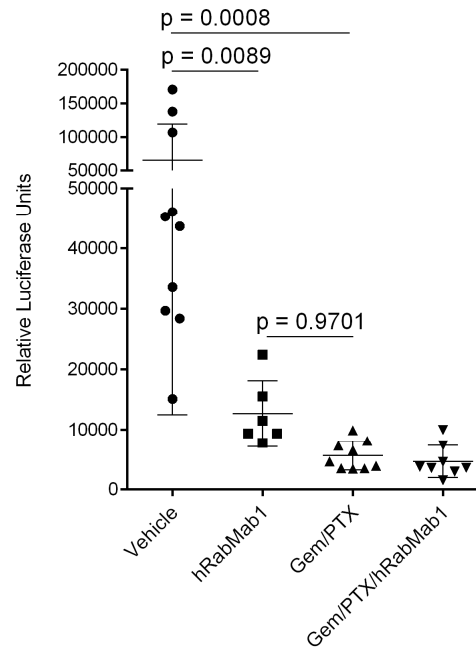

**Supplementary Figure S2.** Relative luciferase units, metastatic spread to the liver assessed by quantitative luciferase imaging in experimental cohorts as indicated; 1-way ANOVA with Tukey's multiple comparison test was used to assess significance. Liver tissue was harvested and imaged immediately following the removal of primary tumors.

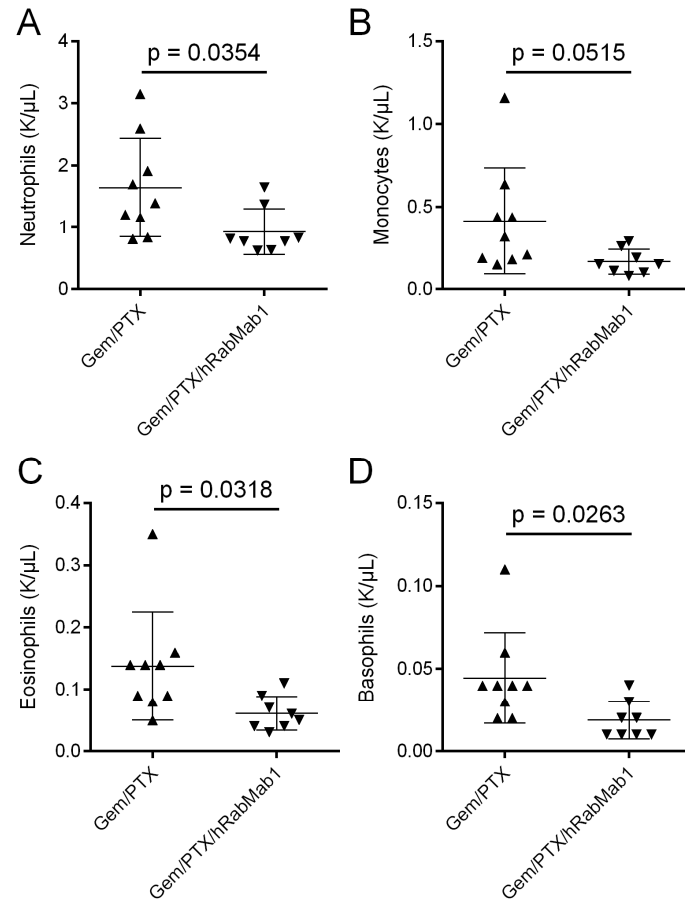

**Supplementary Figure S3.** White blood cell counts in Gem/PTX and Gem/PTX/hRabMab1 cohorts (1 dot = 1 mouse): A, neutrophils; B, monocytes; C, eosinophils; D, basophils. Whole blood was collected via venipuncture at the time of sacrifice in EDTA-coated tubes; two-tailed t test was used to assess significance.
